# Supplementary material for: Improving Graduate Education to Support a Branching Career Pipeline: Recommendations Based on a Survey of Doctoral Students in the Basic Biomedical Sciences
Source: PubMed Central journal article supplement — CBE Life Sci Educ. 2011 Fall;10(3):239–49. doi: 10.1187/cbe.11-02-0013 (PMC3164563; doi:10.1187/cbe.11-02-0013), 2011
Supplement: supp_10.3.239_CombinedSupMats2.pdf [file supp_10.3.239_CombinedSupMats2.pdf]

## Supplemental Material 2. Additional Figures

Figure S1. Current career choice of UCSF doctoral students ..... 1  
 Figure S2. Confidence in current career choice drops during the second year in graduate studies. .... 2

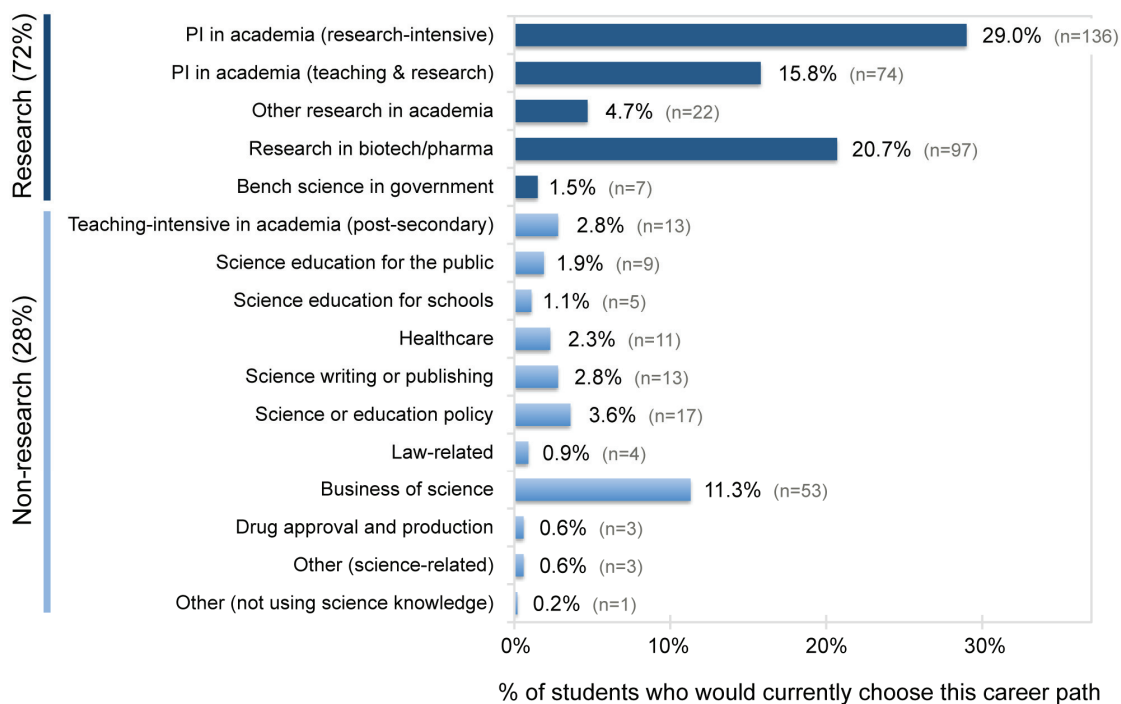

**Figure S1. Current career choice of UCSF doctoral students**

Bar graph shows percentage of all student respondents who chose each category as their current career choice. Bars in dark blue represent research careers; bars in light blue represent non-research careers.

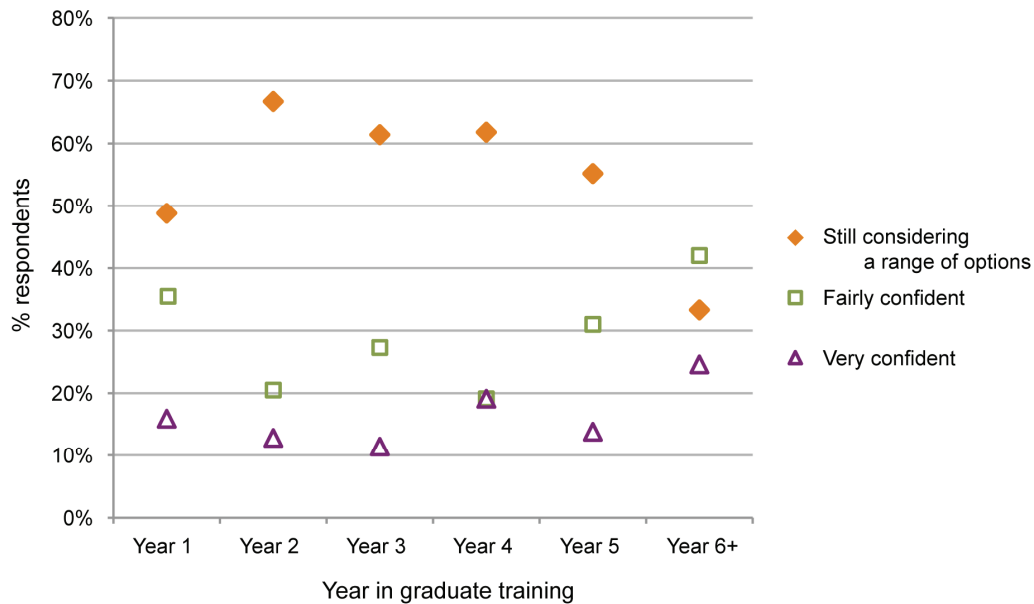

**Figure S2. Confidence in current career choice drops during the second year in graduate studies.**

When students were asked to rate their confidence in their current career choice, 54.9% of all respondents reported the lowest level of confidence, “I am still considering a range of options.” 29.3% of all respondents reported “I am fairly confident in this career choice.” Only 15.8% of all respondents reported “I am very confident in this career choice.” Confidence in career choice depended on stage of graduate training, as shown in this graph.
